# Supplementary material for: Chronic Osteomyelitis Increases the Incidence of Type 2 Diabetes in Humans and Mice
Source: PubMed Central journal article supplement — Int J Biol Sci. 2017 Sep 5;13(9):1192–202. doi: 10.7150/ijbs.21379 (PMC5666334; doi:10.7150/ijbs.21379), 2017-09-05
Supplement: ijbsv13p1192s1.pdf [file ijbsv13p1192s1.pdf]

Supplemental Table 1 Correlation between fasting blood glucose and potential risk factors in patients without COM

| Parameters               | r     | P value  |
|--------------------------|-------|----------|
| BMI (kg/m <sup>2</sup> ) | 0.114 | 0.090    |
| TC (mmol/L)              | 0.021 | 0.761    |
| TG (mmol/L)              | 0.154 | 0.022*   |
| LDL (mmol/L)             | 0.084 | 0.211    |
| WBC (mmol/L)             | 0.210 | 0.002**  |
| CRP (mg/L)               | 0.302 | <0.001** |

BMI, body mass index; TC, Total cholesterol; TG, Triglyceride; LDL, low density lipoprotein  
WBC, white blood cells; CRP, C-reactive protein. \*, p<0.05; \*\*, p<0.01
